# Supplementary material
Source: ML conference proceedings conference paper supplement (https://openreview.net/forum?id=s1jQ91yFAb)
Supplement: supplementary_material [file attachment]

## A Full Proofs of Presented Results

In this appendix, we present full proofs of all results which are not already complete in the main text.

**Proof of Theorem 4** For any  $i \in [d]$  and  $x \in \mathcal{Z}^d$  define

$$M^{(i)} = \mathbb{E}_{X \sim \mu}[f(X)|\mathcal{B}^c, X^{[i]} = x^{[i]}] - \mathbb{E}_{X \sim \mu}[f(X)|\mathcal{B}^c, X^{[i-1]} = x^{[i-1]}]. \quad (26)$$

with the edge case

$$M^{(1)} = \mathbb{E}_{X \sim \mu}[f(X)|\mathcal{B}^c, X_1 = x_1] - \mathbb{E}_{X \sim \mu}[f(X)|\mathcal{B}^c] \quad (27)$$

Due to  $\mathbb{E}_{X \sim \mu}[f(X)|\mathcal{B}^c, X = x] = f(x)$  for  $x \in \mathcal{B}^c$  we have

$$f - \mathbb{E}_{X \sim \mu}[f(X)|\mathcal{B}^c] = \sum_{i=1}^d M^{(i)} \quad (28)$$

Since the conditions  $X^{[i]} = x^{[i]}$  generate a nested sequence of  $\sigma$ -algebras, the quantities  $K^{(i+1)}f(x) = \mathbb{E}_{\mu}[f(X)|\mathcal{B}^c, X^{[i]} = x^{[i]}]$  are a Doob martingale and (26) is a martingale difference sequence. In order to bound the moment generating function of  $f$ , we will bound every  $M^{(i)}$  from above and below and apply the Azuma-Hoeffding theorem [34, Theorem 4.1]. We have

$$M^{(i)} = \mathbb{E}_{\mu}[f(X)|\mathcal{B}^c, X^{[i]} = x^{[i]}] - \mathbb{E}_{\mu}[f(X)|\mathcal{B}^c, X^{[i-1]} = x^{[i-1]}] \quad (29a)$$

$$= \mathbb{E}_{\mu}[f(X)|\mathcal{B}^c, X^{[i]} = x^{[i]}] - \mathbb{E}_{\mu}[\mathbb{E}_{\mu}[f(X)|\mathcal{B}^c, X^{[i-1]} = x^{[i-1]}, X_i]|\mathcal{B}^c, X^{[i-1]} = x^{[i-1]}] \quad (29b)$$

$$= \int f(x^{[i]}y^{(i,d)})\mu(dy^{(i,d)}|x^{[i]}, \mathcal{B}^c) - \int \left( \int f(x^{[i]}u^{(i,d)})\mu(du^{(i,d)}|x^{[i-1]}, y_i, \mathcal{B}^c) \right) \mu(dy^{(i,d)}|x^{[i-1]}, \mathcal{B}^c) \quad (29c)$$

by the tower property of conditional expectations. Because  $\mu(dy^{(i,d)}|x^{[i-1]}, \mathcal{B}^c)$  is a probability measure, it holds

$$\int f(x^{[i]}y^{(i,d)})\mu(dy^{(i,d)}|x^{[i]}, \mathcal{B}^c) = \int \left( \int f(x^{[i-1]}x_i u^{(i,d)})\mu(du^{(i,d)}|x^{[i]}, \mathcal{B}^c) \right) \mu(dy^{(i,d)}|x^{[i-1]}, \mathcal{B}^c) \quad (30)$$

and we find

$$M^{(i)} = \int \mu(dy^{(i,d)}|x^{[i-1]}, \mathcal{B}^c) \left( \int f(x^{[i-1]}x_i u^{(i,d)})\mu(du^{(i,d)}|x^{[i]}, \mathcal{B}^c) - \int f(x^{[i]}u^{(i,d)})\mu(du^{(i,d)}|x^{[i-1]}, y_i, \mathcal{B}^c) \right) \quad (31)$$

Now bound  $A^{(i)} \leq M^{(i)} \leq B^{(i)}$  almost surely with

$$A^{(i)} = \int \mu(dy^{(i,d)}|x^{[i-1]}, \mathcal{B}^c) \inf_{x_i \in \mathcal{B}_i^c(x^{[i-1]})} \left( \int f(x^{[i-1]}x_i u^{(i,d)})\mu(du^{(i,d)}|x^{[i]}, \mathcal{B}^c) - \int f(x^{[i]}u^{(i,d)})\mu(du^{(i,d)}|x^{[i-1]}, y_i, \mathcal{B}^c) \right) \quad (32a)$$

$$B^{(i)} = \int \mu(dy^{(i,d)}|x^{[i-1]}, \mathcal{B}^c) \sup_{x_i \in \mathcal{B}_i^c(x^{[i-1]})} \left( \int f(x^{[i-1]}x_i u^{(i,d)})\mu(du^{(i,d)}|x^{[i]}, \mathcal{B}^c) - \int f(x^{[i]}u^{(i,d)})\mu(du^{(i,d)}|x^{[i-1]}, y_i, \mathcal{B}^c) \right) \quad (32b)$$

where  $\mathcal{B}_i^c(x^{[i-1]})$  contains all  $x_i \in \mathcal{Z}$  such that there exist  $x^{(i,d)} \in \mathcal{Z}^{d-i}$  with  $(x^{[i-1]}, x_i, x^{(i,d)}) \in \mathcal{B}^c$ . Because every realization of a random variable conditioned on  $\mathcal{B}^c$  is in the set of good inputs, the difference  $\|B^{(i)} - A^{(i)}\|_{\infty}$  can be written as

$$\sup_{x, z \in \mathcal{B}^c, x^{[d] \setminus \{i\}} = z^{[d] \setminus \{i\}}} \int f(x^{[i]}u^{(i,d)})\mu(du^{(i,d)}|x^{[i]}, \mathcal{B}^c) - \int f(z^{[i]}u^{(i,d)})\mu(du^{(i,d)}|z^{[i]}, \mathcal{B}^c) \quad (33)$$

506 By seeing this expression in terms of oscillation of the kernel action  $K^{(i+1)}f$ , we find

$$\|B^{(i)} - A^{(i)}\|_\infty \leq \|\rho\| \delta_i(K^{(i+1)}\tilde{f}) \leq \|\rho\| (V^{(i+1)}\delta(\tilde{f}))_i = (\Gamma\delta(\tilde{f}))_i \quad (34)$$

507 where  $\tilde{f}: \mathcal{B}^c \rightarrow \mathbb{R}$  is the restriction of  $f$  to  $\mathcal{B}^c$ . The assertion then follows from the Azuma-Hoeffding  
508 theorem [34, Theorem 4.1] which we recite as Theorem 10 to make this paper self-contained.

509 **Proof of Proposition 6** For arbitrary  $z, z' \in \mathcal{Z}^d$  it holds

$$|f(z) - f(z')| \leq \delta_j(f)\rho(z_j, z'_j), \quad \forall i \in [d] \quad (35)$$

510 and thus, by summing over all indices we get

$$|f(z) - f(z')| \leq \frac{1}{d} \sum_{j \in [d]} \delta_j(f)\rho(z_j, z'_j) \quad (36)$$

511 Let  $x, z \in \mathcal{Z}^d$  with  $x^{[d] \setminus \{i\}} = z^{[d] \setminus \{i\}}$  be given for some  $i \in [d]$ . Recall the action (8) of Markov  
512 kernels  $K^{(i+1)}$  is an expected value with respect to conditional distributions  $\mu^{(i,d]}(dy^{(i,d]}|x^{[i]})$ .

513 Because  $\nu^d$  has no atoms,  $\nu^d|_{\mathcal{A}^c}$  also has no atoms. Therefore, there is a unique KR-rearrangement  
514  $\hat{T}$  with  $\hat{T}_\# \nu^d = \nu^d|_{\mathcal{A}^c}$ . Then  $\tilde{T} = T \circ \hat{T}$  is a KR-rearrangement with

$$\tilde{T}_\# \nu^d = \mu|_{\mathcal{B}^c} \quad (37)$$

515 by Lemma 9 and we have  $\tilde{T}(\hat{x}) = x$ . Lemma 3 implies

$$\mu^{(i,d]}(dy^{(i,d]}|\mathcal{B}^c, x^{[i]}) = \tilde{T}(\hat{x}^{[i]}, \cdot)_\# \nu^{d-i} \quad (38)$$

516 An analogous expression holds for the distribution conditioned on  $z$ . We have therefore found two  
517 transport functions pushing the reference measure to the respective conditional distributions. By  
518 Lemma 5, a coupling of the conditional distributions is then given by

$$P_{x,z}^{[i]} = (\tilde{T}^{(i,d]}(\hat{x}^{[i]}, \cdot), \tilde{T}^{(i,d]}(\hat{z}^{[i]}, \cdot))_\# \nu^{d-i} \quad (39)$$

519 Using a change of measure we find

$$\begin{aligned} & K^{(i+1)}f(x) - K^{(i+1)}f(z) \\ &= \int P_{x,z}^{[i]}(du^{(i,d]}, dv^{(i,d]}) (f(x^{[i]}u^{(i,d]}) - f(z^{[i]}v^{(i,d]})) \end{aligned} \quad (40)$$

$$= \int (f(x^{[i]}\tilde{T}^{(i,d]}(\hat{x}^{[i]}, \tau)) - f(z^{[i]}\tilde{T}^{(i,d]}(\hat{z}^{[i]}, \tau))) \nu^{d-i}(\tau) \quad (41)$$

$$\leq \frac{\delta_i(f)}{d} \rho(x_i, z_i) + \sum_{j \in (i,d]} \frac{\delta_j(f)}{d} \int \rho(\tilde{T}^{(i,d]}(\hat{x}^{[i]}, \tau)_j, \tilde{T}^{(i,d]}(\hat{z}^{[i]}, \tau)_j) \nu^{d-i}(\tau) \quad (42)$$

$$\leq \frac{\delta_i(f)}{d} \rho(x_i, z_i) + \sum_{j \in (i,d]} \frac{\delta_j(f)}{d} L_{ij} \rho(x_i, z_i) \quad (43)$$

520 which shows

$$\delta_i(K^{(i+1)}f) \leq \frac{1}{d} \left( \delta_i(f) + \sum_{j \in (i,d]} L_{ij} \delta_j(f) \right) \quad (44)$$

521 for good inputs. We have thus found a Wasserstein matrix  $V^{(i+1)}$  for  $K^{(i+1)}$  with entries

$$V_{ij}^{(i+1)} = \begin{cases} 0 & \text{if } i > j \\ d^{-1} & \text{if } i = j \\ d^{-1} L_{ij} & \text{if } i < j \end{cases} \quad (45)$$

522 in row  $i$  which shows the assertion.

523 **Proof of Theorem 7** For any hypothesis  $h \in \mathcal{H}$ , we have

$$\mathcal{R}(h) - \mathcal{R}_m(h, \mathcal{D}_m) = \mathbb{E}_{Z \sim \mu} [L(h, Z) - \mathcal{R}_m(h, \mathcal{D}_m)] \quad (46a)$$

$$= \mathbb{E}_{Z \sim \mu} \left[ \left( L(h, Z) - \mathcal{R}_m(h, \mathcal{D}_m) \right) \mathbf{1}\{Z \notin \mathcal{B}\} \right] \\ + \mathbb{E}_{Z \sim \mu} \left[ \left( L(h, Z) - \mathcal{R}_m(h, \mathcal{D}_m) \right) \mathbf{1}\{Z \in \mathcal{B}\} \right] \quad (46b)$$

$$\leq \mathbb{E}_{Z \sim \mu} \left[ \left( L(h, Z) - \mathcal{R}_m(h, \mathcal{D}_m) \right) \mathbf{1}\{Z \notin \mathcal{B}\} \right] + \xi \quad (46c)$$

$$\leq \mathbb{E}_{Z \sim \mu|\mathcal{B}^c} [L(h, Z)] - \mathcal{R}_m(h, \mathcal{D}_m) + \xi \quad (46d)$$

524 where in (46c) we have used that pointwise loss is in  $[0, 1]$ . Note that the underlying distribution of  
525 the risk  $\mathcal{R}(h)$  is  $\mu$ , while  $\mathcal{D}_m$  are drawn from  $\mu|\mathcal{B}^c$ . The above inequality reconciles this such that  
526 a concentration argument for the conditional distribution becomes applicable. For any PAC-Bayes  
527 posterior distribution  $\zeta$  and any  $\beta > 0$ , this implies

$$\mathcal{R}(\zeta) - \mathcal{R}_m(\zeta, \mathcal{D}_m) = \mathbb{E}_{h \sim \zeta} \mathbb{E}_{Z \sim \mu} [L(h, Z) - \mathcal{R}_m(h, \mathcal{D}_m)] \quad (47a)$$

$$\leq \mathbb{E}_{h \sim \zeta} [\mathbb{E}_{Z \sim \mu|\mathcal{B}^c} [L(h, Z)] - \mathcal{R}_m(h, \mathcal{D}_m)] + \xi \quad (47b)$$

$$= \frac{1}{\beta} \mathbb{E}_{h \sim \zeta} [\beta (\mathbb{E}_{Z \sim \mu|\mathcal{B}^c} [L(h, Z)] - \mathcal{R}_m(h, \mathcal{D}_m))] + \xi \quad (47c)$$

$$\leq \frac{1}{\beta} \log \mathbb{E}_{h \sim \pi} \left[ \exp (\beta (\mathbb{E}_{Z \sim \mu|\mathcal{B}^c} [L(h, Z)] - \mathcal{R}_m(h, \mathcal{D}_m))) \right] \\ + \frac{1}{\beta} \text{KL}[\zeta : \pi] + \xi \quad (47d)$$

528 by Donsker and Varadhan's variational formula [2, Lemma 2.2]. Focusing on the first term, we find

$$\exp (\beta (\mathbb{E}_{Z \sim \mu|\mathcal{B}^c} [L(h, Z)] - \mathcal{R}_m(h, \mathcal{D}_m))) = \exp \left( \frac{\beta}{m} \sum_{k \in [m]} (\mathbb{E}_{Z \sim \mu|\mathcal{B}^c} [L(h, Z)] - L(h, Z^{(k)})) \right) \quad (48a)$$

$$= \prod_{k \in [m]} \exp \left( \frac{\beta}{m} (\mathbb{E}_{Z \sim \mu|\mathcal{B}^c} [L(h, Z)] - L(h, Z^{(k)})) \right) \quad (48b)$$

529 Each structured datum  $Z^{(k)}$  is drawn independently from  $\mu|\mathcal{B}^c$ . By Proposition 6 there exists a  
530 Wasserstein dependency matrix  $\Gamma = \frac{\|\rho\|}{d} D$  for  $\mu|\mathcal{B}^c$  where  $D$  has entries (17). Then

$$\mathbb{E}_{\mathcal{D}_m \sim (\mu|\mathcal{B}^c)^m} \prod_{k \in [m]} \exp \left( \frac{\beta}{m} (\mathbb{E}_{Z \sim \mu|\mathcal{B}^c} [L(h, Z)] - L(h, Z^{(k)})) \right) \\ = \prod_{k \in [m]} \mathbb{E}_{Z^{(k)} \sim (\mu|\mathcal{B}^c)} \exp \left( \frac{\beta}{m} (\mathbb{E}_{Z \sim \mu|\mathcal{B}^c} [L(h, Z)] - L(h, Z^{(k)})) \right) \quad (49a)$$

$$= \prod_{k \in [m]} \mathbb{E}_{Z^{(k)} \sim \mu|\mathcal{B}^c} \left[ \exp \left( \frac{\beta}{m} (\mathbb{E}_{Z \sim \mu|\mathcal{B}^c} [L(h, Z)] - L(h, Z^{(k)})) \right) \right] \quad (49b)$$

$$\leq \prod_{k \in [m]} \exp \left( \frac{\beta^2}{8m^2} \|\Gamma \delta(\tilde{L}(h, \cdot))\|_2^2 \right) \text{ by Theorem 4} \quad (49c)$$

$$= \exp \left( \frac{\beta^2}{8m} \|\Gamma \delta(\tilde{L}(h, \cdot))\|_2^2 \right) \quad (49d)$$

$$\leq \exp \left( \frac{\beta^2}{8m} \|\Gamma \tilde{\delta}\|_2^2 \right) \quad (49e)$$

531 Denote the shorthand

$$U = \mathbb{E}_{\mathcal{D}_m \sim (\mu|\mathcal{B}^c)^m} [\exp (\beta (\mathbb{E}_{Z \sim \mu|\mathcal{B}^c} [L(h, Z)] - \mathcal{R}_m(h, \mathcal{D}_m)))] \quad (50)$$

By Markov's inequality it holds

$$\mathbb{P}_{\mathcal{D}_m \sim (\mu|_{\mathcal{B}^c})^m} \left[ \exp(\beta(\mathbb{E}_{Z \sim \mu|_{\mathcal{B}^c}}[L(h, Z)] - \mathcal{R}_m(h, \mathcal{D}_m))) \geq \frac{1}{\delta} U \right] \leq \delta \quad (51)$$

and combining this with (49) we have

$$\exp(\beta(\mathbb{E}_{Z \sim \mu|_{\mathcal{B}^c}}[L(h, Z)] - \mathcal{R}_m(h, \mathcal{D}_m))) \leq \frac{1}{\delta} \exp\left(\frac{\beta^2}{8m} \|\Gamma \tilde{\delta}\|_2^2\right) \quad (52)$$

with probability at least  $1 - \delta$  over the sample. Using (47) we thus have

$$\mathcal{R}(\zeta) - \mathcal{R}_m(\zeta, \mathcal{D}_m) \leq \frac{1}{\beta} \left( \log \mathbb{E}_{h \sim \pi} \left[ \frac{1}{\delta} \exp\left(\frac{\beta^2}{8m} \|\Gamma \tilde{\delta}\|_2^2\right) \right] + \text{KL}[\zeta : \pi] \right) + \xi \quad (53a)$$

$$= \frac{\beta}{8m} \|\Gamma \tilde{\delta}\|_2^2 + \frac{1}{\beta} \left( \log \frac{1}{\delta} + \text{KL}[\zeta : \pi] \right) + \xi \quad (53b)$$

Ideally, we would minimize the right hand side with respect to  $\beta$ . However, this would mean to have  $\beta$  depend on  $\zeta$  and we thus would not have a uniform bound for all posterior distributions.

Instead, [37] approaches the problem by defining a sequence of constant  $(\delta_j, \beta_j)_{j \in \mathbb{N}_0}$  and bounding the probability that the bound does not hold for any sequence element. Since in the opposite (high-probability) case, the bound holds for all sequence elements, an optimal one can subsequently be chosen dependent on the posterior.

For all  $j \in \mathbb{N}_0$ , define

$$\delta_j = \delta 2^{-(j+1)}, \quad \beta_j = 2^j \sqrt{\frac{8m \log \frac{1}{\delta}}{\|\Gamma \tilde{\delta}\|_2^2}} \quad (54)$$

which are independent of  $\zeta$ . Now consider the event  $E_j$  that

$$\exp(\beta_j(\mathbb{E}_{X \sim \mu|_{\mathcal{B}^c}}[\ell(h, X)] - \mathcal{R}_m(h, \mathcal{D}_m))) \geq \frac{1}{\delta_j} \exp\left(\frac{\beta_j^2}{8m} \|\Gamma \tilde{\delta}\|_2^2\right) \quad (55)$$

By the above argument leading up to (52), the probability for  $E_j$  under a random sample of the conditioned data distribution  $\mu|_{\mathcal{B}^c}$  is at most  $\delta_j$ . Therefore, the probability that any  $E_j$  occurs is bounded by

$$\mathbb{P}\left(\bigcup_{j \in \mathbb{N}_0} E_j\right) \leq \sum_{j \in \mathbb{N}_0} \mathbb{P}(E_j) \leq \sum_{j \in \mathbb{N}_0} \delta_j = \delta \quad (56)$$

Thus, for all posteriors  $\zeta$  with probability at least  $1 - \delta$  none of the events (55) occurs. We may therefore select an index  $j$  dependent on  $\zeta$  to obtain a sharper risk certificate which still holds with probability at least  $1 - \delta$  over the sample conditioned on the good set. For a fixed posterior  $\zeta$ , the optimizer of (53b) would be

$$\beta^* = \frac{1}{\|\Gamma \tilde{\delta}\|_2} \sqrt{8m(\log \frac{1}{\delta} + \text{KL}[\zeta : \pi])} \quad (57)$$

Equating this to (55) and rounding down to the nearest integer gives

$$j^* = \left\lfloor \frac{1}{2} \log_2 \left( 1 + \frac{\text{KL}[\zeta : \pi]}{\log \frac{1}{\delta}} \right) \right\rfloor \quad (58)$$

Denote this number before rounding by  $r$ , i.e.  $j^* = \lfloor r \rfloor$ . For any real number  $r$  it holds  $r - 1 \leq \lfloor r \rfloor \leq r$ . Therefore

$$\frac{1}{2} \sqrt{1 + \frac{\text{KL}[\zeta : \pi]}{\log \frac{1}{\delta}}} = 2^{r-1} \leq 2^{j^*} \leq 2^r = \sqrt{1 + \frac{\text{KL}[\zeta : \pi]}{\log \frac{1}{\delta}}} \quad (59)$$

which gives the following bounds on  $u_{j^*}$

$$\frac{1}{2} \sqrt{\frac{8m(\log \frac{1}{\delta} + \text{KL}[\zeta : \pi])}{\|\Gamma \tilde{\delta}\|_2^2}} \leq u_{j^*} \leq \sqrt{\frac{8m(\log \frac{1}{\delta} + \text{KL}[\zeta : \pi])}{\|\Gamma \tilde{\delta}\|_2^2}} \quad (60)$$

554 Likewise, we bound

$$\text{KL}[\zeta : \pi] + \log \frac{1}{\delta_{j^*}} = \text{KL}[\zeta : \pi] + \log \frac{2}{\delta} + j^* \log 2 \quad (61a)$$

$$\leq \text{KL}[\zeta : \pi] + \log \frac{2}{\delta} + \frac{\log 2}{2} \log_2 \left( 1 + \frac{\text{KL}[\zeta : \pi]}{\log \frac{1}{\delta}} \right) - \log 2 \quad (61b)$$

$$= \text{KL}[\zeta : \pi] + \log \frac{1}{\delta} + \frac{1}{2} \log \left( 1 + \frac{\text{KL}[\zeta : \pi]}{\log \frac{1}{\delta}} \right) \quad (61c)$$

$$= \text{KL}[\zeta : \pi] + \log \frac{1}{\delta} + \frac{1}{2} \log \left( \log \frac{1}{\delta} + \text{KL}[\zeta : \pi] \right) - \frac{1}{2} \log \log \frac{1}{\delta} \quad (61d)$$

555 The assumption  $\delta \leq \exp(-e^{-1})$  yields  $-\log \log \frac{1}{\delta} \leq 1$  and because  $x + 1 \leq \exp(x)$  for all  $x \in \mathbb{R}$ ,  
556 we find

$$\text{KL}[\zeta : \pi] + \log \frac{1}{\delta_{j^*}} \leq \text{KL}[\zeta : \pi] + \log \frac{1}{\delta} + \frac{1}{2} \left( \log \left( \log \frac{1}{\delta} + \text{KL}[\zeta : \pi] \right) + 1 \right) \quad (62a)$$

$$\leq \text{KL}[\zeta : \pi] + \log \frac{1}{\delta} + \frac{1}{2} \left( \log \frac{1}{\delta} + \text{KL}[\zeta : \pi] \right) \quad (62b)$$

$$= \frac{3}{2} \left( \log \frac{1}{\delta} + \text{KL}[\zeta : \pi] \right) \quad (62c)$$

557 We can now use the bounds (62c) and (60) in (53b) to bound the expected generalization error

$$\mathcal{R}(\zeta) - \mathcal{R}_m(\zeta, \mathcal{D}_m) \leq \frac{u_{j^*}}{8m} \|\Gamma \tilde{\delta}\|_2^2 + \frac{1}{u_{j^*}} \left( \log \frac{1}{\delta_{j^*}} + \text{KL}[\zeta : \pi] \right) + \xi \quad (63a)$$

$$\leq \frac{u_{j^*}}{8m} \|\Gamma \tilde{\delta}\|_2^2 + \frac{3}{2u_{j^*}} \left( \log \frac{1}{\delta} + \text{KL}[\zeta : \pi] \right) + \xi \quad (63b)$$

$$\leq \frac{1}{2} \|\Gamma \tilde{\delta}\|_2 \sqrt{\frac{\log \frac{1}{\delta} + \text{KL}[\zeta : \pi]}{2m}} + \frac{3}{2} \|\Gamma \tilde{\delta}\|_2 \sqrt{\frac{\log \frac{1}{\delta} + \text{KL}[\zeta : \pi]}{2m}} + \xi \quad (63c)$$

$$= 2 \|\Gamma \tilde{\delta}\|_2 \sqrt{\frac{\log \frac{1}{\delta} + \text{KL}[\zeta : \pi]}{2m}} + \xi \quad (63d)$$

558 Note that  $\beta^*$  would attain the optimal value

$$\mathcal{R}(\zeta) - \mathcal{R}_m(\zeta, \mathcal{D}_m) \leq \|\Gamma \tilde{\delta}\|_2 \sqrt{\frac{\text{KL}[\zeta : \pi] + \log \frac{1}{\delta}}{2m}} + \xi \quad (64)$$

559 which only differs from the above uniform bound by a factor of two. Finally, recall  $\Gamma = \frac{\|\rho\|}{d} D$  where  
560  $D$  has entries (17).

## 561 B Additional Lemmata

562 **Lemma 9.** Let  $T: \Omega \rightarrow \Omega$  be a measurable function on a measurable space  $(\Omega, \Sigma)$  and let  $\nu, \mu$   
563 be measures on  $\Omega$  with  $T_{\#}\nu = \mu$ . Let  $B \in \Sigma$  be a fixed set with  $\mu(B) > 0$  and  $A = T^{-1}(B)$  its  
564 preimage under  $T$ . Then

$$T_{\#}(\nu|A) = \mu|B. \quad (65)$$

565 *Proof.* Let  $S \in \Sigma$  be arbitrary and let  $\tilde{\mu} = T_{\#}(\nu|A)$ . Then

$$\tilde{\mu}(S) = (\nu|A)(T^{-1}(S)) = \frac{\nu(T^{-1}(S) \cap A)}{\nu(A)} \quad (66)$$

566 as well as

$$(\mu|B)(S) = \frac{\mu(S \cap B)}{\mu(B)} = \frac{\nu(T^{-1}(S \cap B))}{\nu(A)} \quad (67)$$

567 Note that

$$x \in T^{-1}(S) \cap T^{-1}(B) \Leftrightarrow T(x) \in S \wedge T(x) \in B \Leftrightarrow T(x) \in S \cap B \Leftrightarrow x \in T^{-1}(S \cap B) \quad (68)$$

568 thus  $T^{-1}(S) \cap T^{-1}(B) = T^{-1}(S \cap B)$  and consequently  $\tilde{\mu}(S) = (\mu|B)(S)$ . Since  $S$  was arbitrary,  
569 this shows the assertion.  $\square$

570 The following theorem exists in various forms in the literature. To make this paper self-contained, we  
 571 recite the version in [34] which is used to bound moment-generating functions in Proposition 4. Note  
 572 that we only use the MGF bound (69) in our analysis. However, the concentration inequality (70)  
 573 also holds analogously under the assumptions of Proposition 4 which may be of independent interest.

574 **Theorem 10 (Azuma-Hoeffding [34, Theorem 4.1]).** *Let  $(M^{(i)})_{i \in [m]}$  be a martingale difference*  
 575 *sequence with respect to a filtration  $(\Sigma_i)_{i \in [m]}$  of sigma algebras. Suppose that for each  $i \in [m]$  there*  
 576 *exist  $\Sigma_{i-1}$ -measurable random variables  $A^{(i)}, B^{(i)}$  such that  $A^{(i)} \leq M^{(i)} \leq B^{(i)}$  almost surely.*  
 577 *Then for all  $\lambda \in \mathbb{R}$  it holds that*

$$\mathbb{E} \left[ \exp \left( \lambda \sum_{i \in [m]} M^{(i)} \right) \right] \leq \exp \left( \frac{\lambda^2}{8} \sum_{i \in [m]} \|B^{(i)} - A^{(i)}\|_\infty^2 \right) \quad (69)$$

578 and consequently, for any  $t \geq 0$

$$\mathbb{P} \left( \left| \sum_{i \in [m]} M^{(i)} \right| \geq t \right) \leq 2 \exp \left( - \frac{2t^2}{\sum_{i \in [m]} \|B^{(i)} - A^{(i)}\|_\infty^2} \right). \quad (70)$$
